# Supplementary material for: Large electrostrain and high optical temperature sensitivity in BaTiO3-(Na0.5Ho0.5)TiO3 multifunctional ferroelectric ceramics
Source: Royal Society of Chemistry journal article supplement (doi:10.1039/c6dt01424k), 2016-01-01
Supplement: c6dt01424k1.pdf [file c6dt01424k1.pdf]

## Supporting Information

### Large Electrostrain and High Optical Temperature Sensitivity in BaTiO<sub>3</sub>- (Na<sub>0.5</sub>Ho<sub>0.5</sub>)TiO<sub>3</sub> Multifunctional Ferroelectric Ceramics

*Jun Li, Xiaona Chai, Xusheng Wang,\* Chao-Nan Xu, Yihao Gu, Haifeng Zhao, and Xi Yao*

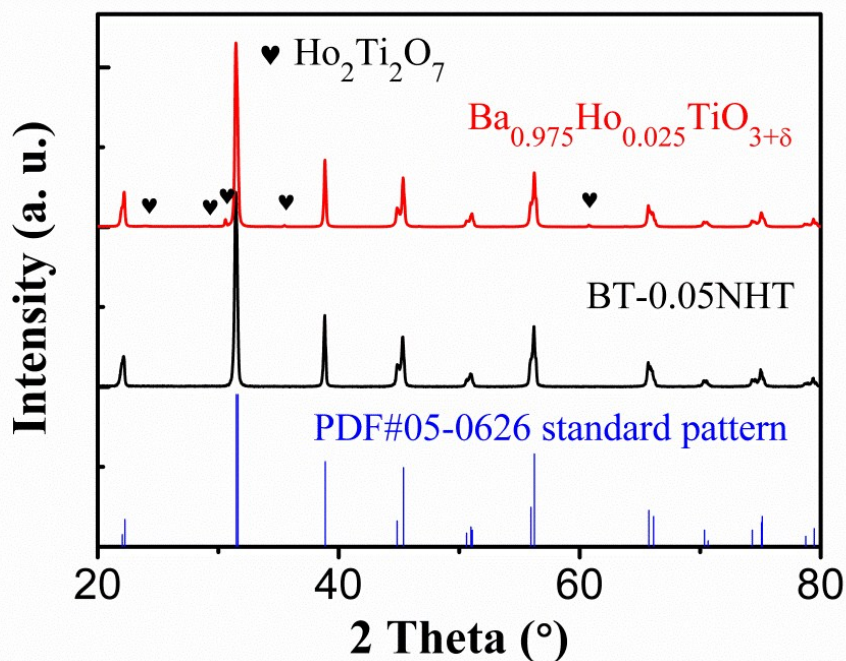

Figure S1. XRD patterns of the obtained BaTiO<sub>3</sub>-0.05Na<sub>0.5</sub>Ho<sub>0.5</sub>TiO<sub>3</sub> and 2.5 mol% Ho<sup>3+</sup>-doped BaTiO<sub>3</sub>.

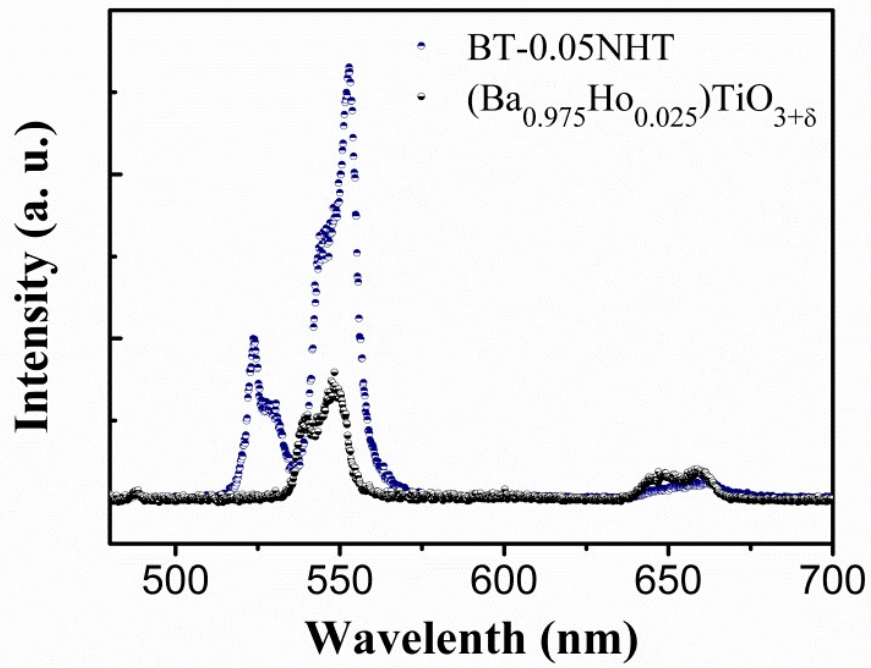

Figure S2. Upconversion emission of the obtained  $\text{BaTiO}_3\text{-}0.05\text{Na}_{0.5}\text{Ho}_{0.5}\text{TiO}_3$  and 2.5 mol%  $\text{Ho}^{3+}$ -doped  $\text{BaTiO}_3$  under the 980 nm laser excitation with the same power at room temperature.
